# Supplementary material for: {RuNO}6vs. co-ligand oxidation: two non-innocent groups in one ruthenium nitrosyl complex
Source: Royal Society of Chemistry journal article supplement (doi:10.1039/c4dt01388c), 2014-01-01
Supplement: c4dt01388c1.pdf [file c4dt01388c1.pdf]

## Supporting Information

# $\{\text{RuNO}\}^6$ vs. Co-Ligand Oxidation: Two Non-Innocent Groups in One Ruthenium Nitrosyl Complex

**Ashley B. McQuarters and Nicolai Lehnert\***

*Department of Chemistry and Department of Biophysics, University of Michigan, Ann Arbor, MI 48109*

## Computational Procedures

The structure of  $[\text{Ru}(\text{L})(\text{PPh}_3)(\text{NO})(\text{Cl})]^{2+}$  was fully optimized for the singlet ( $S = 0$ ) ground state of this complex, and the structures of  $[\text{Ru}(\text{L})(\text{PPh}_3)(\text{NO})(\text{Cl})]^{+/3+}$  were fully optimized for their doublet ( $S = 1/2$ ) ground states using the BP86 functional<sup>1</sup> and the TZVP basis set.<sup>2</sup> The crystal structure of  $[\text{Ru}(\text{L})(\text{PPh}_3)(\text{NO})(\text{Cl})]^{2+}$  was used as a starting point for the geometry optimization of  $[\text{Ru}(\text{L})(\text{PPh}_3)(\text{NO})(\text{Cl})]^{2+}$ . Vibrational frequencies calculated for all structures show no imaginary frequencies. All of these calculations were performed using the program package Gaussian 09.<sup>3</sup> For comparison, the structure of  $[\text{Ru}(\text{L})(\text{PPh}_3)(\text{NO})(\text{Cl})]^{2+}$  was also fully optimized for the singlet ground state using the BP86 functional and the def2-TZVPP basis set<sup>4</sup> in conjunction with the ZORA approximation<sup>5</sup>, using the program ORCA.<sup>6</sup> Molecular orbital, TD-DFT, and g-tensor calculations were performed with BP86/TZVP (on the optimized structures) using the program ORCA. In all Gaussian calculations, convergence was reached when the relative change in the density matrix between subsequent iterations was less than  $1 \times 10^{-8}$ . Molecular orbitals were plotted using the program `orca_plot` included in the ORCA package and visualized using GaussView 3.0.

**Table S1.** Coordinates (Å) of the optimized structure for the  $S = 0$  singlet ground state of  $[\text{Ru}(\text{L})(\text{PPh}_3)(\text{NO})(\text{Cl})]^{2+}$ , calculated with BP86/TZVP (L = 1-phenyl-1-(pyridin-2-yl)-2-(pyridin-2-ylmethylene)hydrazine).

| Atom | X           | Y           | Z           |
|------|-------------|-------------|-------------|
| Ru   | 0.09666300  | -0.24961900 | -1.40588200 |
| Cl   | -1.39075000 | -0.94635500 | -3.19673900 |
| P    | 1.48324200  | 0.42630400  | 0.61280400  |
| O    | 2.32177200  | 0.45510500  | -3.21216500 |
| N    | 1.45398600  | 0.18001500  | -2.50784400 |
| N    | -1.04904600 | 1.53827800  | -1.41833400 |
| N    | -1.52902700 | -0.72458900 | -0.22544000 |
| N    | 0.38545200  | -2.33977900 | -1.04292600 |
| N    | -2.45220000 | 0.25660500  | -0.02473900 |
| C    | -0.81658900 | 2.63872500  | -2.17603700 |
| H    | 0.11789400  | 2.65384800  | -2.73341100 |
| C    | -1.71591100 | 3.69324000  | -2.24524900 |
| H    | -1.48881400 | 4.55244500  | -2.87582000 |
| C    | -2.89776700 | 3.61965000  | -1.49743000 |
| H    | -3.62344500 | 4.43408500  | -1.52377400 |
| C    | -3.15584800 | 2.49040300  | -0.72690300 |
| H    | -4.07315400 | 2.38997000  | -0.14830100 |
| C    | -2.22004400 | 1.44630400  | -0.72710600 |
| C    | -3.73455600 | -0.06190700 | 0.57424200  |
| C    | -3.92208000 | 0.15779700  | 1.94420000  |
| H    | -3.11346800 | 0.57179200  | 2.54968300  |
| C    | -5.16276200 | -0.15505900 | 2.51016500  |
| H    | -5.33189800 | 0.01916100  | 3.57403700  |
| C    | -6.18565300 | -0.68323200 | 1.71311700  |
| H    | -7.15218300 | -0.92264200 | 2.16016700  |
| C    | -5.97971600 | -0.90210000 | 0.34453500  |
| H    | -6.78218200 | -1.30872400 | -0.27319500 |
| C    | -4.74725000 | -0.59303400 | -0.23824400 |
| H    | -4.57088500 | -0.75360500 | -1.30438900 |
| C    | -1.66623200 | -1.97074200 | 0.14805200  |
| H    | -2.54841100 | -2.31035900 | 0.69360500  |
| C    | -0.63262000 | -2.88309300 | -0.28927900 |
| C    | -0.67958100 | -4.25788600 | -0.02410100 |
| H    | -1.49668000 | -4.66042400 | 0.57646000  |
| C    | 0.30395400  | -5.09468000 | -0.55528200 |
| H    | 0.27464300  | -6.16903700 | -0.36759400 |
| C    | 1.31126800  | -4.53530700 | -1.34189800 |
| H    | 2.08947300  | -5.15050500 | -1.79413300 |
| C    | 1.31949200  | -3.15478400 | -1.56257700 |
| H    | 2.08845200  | -2.69345500 | -2.17935400 |
| C    | 3.71113300  | -1.12177500 | -0.20374600 |
| H    | 3.46569700  | -0.82068700 | -1.22248400 |
| C    | 4.85739100  | -1.89305400 | 0.00638300  |
| H    | 5.46942000  | -2.19767600 | -0.84480700 |
| C    | 5.22377700  | -2.26464100 | 1.30527800  |
| H    | 6.11834800  | -2.86807000 | 1.46943500  |
| C    | 4.44822700  | -1.84901100 | 2.39177600  |
| H    | 4.73739200  | -2.12192100 | 3.40835100  |
| C    | 3.30471800  | -1.06902400 | 2.18898500  |
| H    | 2.72605900  | -0.73659300 | 3.05065800  |

|   |             |             |             |
|---|-------------|-------------|-------------|
| C | 2.92180600  | -0.70364500 | 0.88484500  |
| C | 0.57403700  | 0.44159400  | 2.21956600  |
| C | 0.08136100  | -0.77684500 | 2.73065500  |
| H | 0.22832900  | -1.70684100 | 2.17858400  |
| C | -0.53977700 | -0.81528200 | 3.98131800  |
| H | -0.89478600 | -1.76704800 | 4.38144500  |
| C | -0.68519100 | 0.35969800  | 4.73025100  |
| H | -1.15862600 | 0.32641800  | 5.71333700  |
| C | -0.19760700 | 1.57019100  | 4.22808400  |
| H | -0.28678300 | 2.48443400  | 4.81785900  |
| C | 0.43180800  | 1.61653300  | 2.97865100  |
| H | 0.83994600  | 2.56154700  | 2.62011600  |
| C | 3.60183000  | 2.27813000  | 0.30158900  |
| H | 4.27150500  | 1.42420500  | 0.40551600  |
| C | 4.14185300  | 3.55618300  | 0.12267000  |
| H | 5.22552700  | 3.67880900  | 0.07791500  |
| C | 3.30367800  | 4.66946100  | 0.01330900  |
| H | 3.73073200  | 5.66497300  | -0.12039500 |
| C | 1.91500500  | 4.50586600  | 0.08547800  |
| H | 1.25721500  | 5.37432600  | 0.01565500  |
| C | 1.36477600  | 3.23238200  | 0.25260600  |
| H | 0.28120400  | 3.12558600  | 0.31937700  |
| C | 2.20674600  | 2.10696600  | 0.36860900  |

---

**Table S2.** Coordinates (Å) of the optimized structure for the  $S = 1/2$  doublet ground state of  $[\text{Ru}(\text{L})(\text{PPh}_3)(\text{NO})(\text{Cl})]^{3+}$ , calculated with BP86/TZVP (L = 1-phenyl-1-(pyridin-2-yl)-2-(pyridin-2-ylmethylene)hydrazine).

| Atom | X           | Y           | Z           |
|------|-------------|-------------|-------------|
| Ru   | -0.03345700 | -0.21000200 | -1.30485800 |
| Cl   | -1.55681300 | -0.97786300 | -3.02305100 |
| P    | 1.66488400  | 0.39302100  | 0.59865900  |
| O    | 1.76766700  | 0.34477200  | -3.56627000 |
| N    | 1.17324600  | 0.14769600  | -2.60875800 |
| N    | -1.12343100 | 1.60296100  | -1.24073900 |
| N    | -1.63962400 | -0.65874500 | -0.09909000 |
| N    | 0.27796500  | -2.29308300 | -0.88956800 |
| N    | -2.60095400 | 0.29480400  | 0.04817100  |
| C    | -0.85144000 | 2.73684200  | -1.93335100 |
| H    | 0.10499900  | 2.77412500  | -2.45203800 |
| C    | -1.74366600 | 3.80201700  | -1.99474700 |
| H    | -1.48334300 | 4.68541100  | -2.57900300 |
| C    | -2.96514700 | 3.70977200  | -1.30955900 |
| H    | -3.68577800 | 4.52887400  | -1.34535100 |
| C    | -3.26193300 | 2.55540800  | -0.59565900 |
| H    | -4.20756200 | 2.43667700  | -0.06729100 |
| C    | -2.32711700 | 1.50574600  | -0.58924500 |
| C    | -3.90279400 | -0.04379900 | 0.59725800  |
| C    | -4.22787300 | 0.36445100  | 1.89809000  |
| H    | -3.50767400 | 0.91644700  | 2.50495500  |
| C    | -5.49534200 | 0.04563600  | 2.39676500  |
| H    | -5.76953800 | 0.34871000  | 3.40875100  |
| C    | -6.40946000 | -0.66215100 | 1.60236700  |
| H    | -7.39893200 | -0.89975200 | 1.99739500  |
| C    | -6.06489500 | -1.06149400 | 0.30300000  |
| H    | -6.78609000 | -1.59823300 | -0.31602200 |
| C    | -4.80328400 | -0.75804800 | -0.21363200 |
| H    | -4.53034300 | -1.03871000 | -1.23390300 |
| C    | -1.78454200 | -1.91421000 | 0.27567400  |
| H    | -2.67210100 | -2.24309400 | 0.82137900  |
| C    | -0.75398200 | -2.82920900 | -0.13984400 |
| C    | -0.81480900 | -4.20343700 | 0.13757400  |
| H    | -1.63985600 | -4.59665600 | 0.73447200  |
| C    | 0.16926900  | -5.05218500 | -0.37768500 |
| H    | 0.12919900  | -6.12619000 | -0.18721400 |
| C    | 1.19161600  | -4.50091900 | -1.14995600 |
| H    | 1.97234100  | -5.12428300 | -1.58846600 |
| C    | 1.21651300  | -3.11660000 | -1.38122900 |
| H    | 2.00886800  | -2.66733600 | -1.97795100 |
| C    | 3.83099000  | -0.91735600 | -0.64980500 |
| H    | 3.52470100  | -0.41912500 | -1.57149600 |
| C    | 4.99215200  | -1.69204100 | -0.66243400 |
| H    | 5.55920900  | -1.80744100 | -1.58822300 |
| C    | 5.43565000  | -2.31134000 | 0.51683200  |
| H    | 6.34438100  | -2.91632600 | 0.50547600  |
| C    | 4.72043200  | -2.14259500 | 1.70828700  |
| H    | 5.07362100  | -2.60908200 | 2.62988100  |

|   |             |             |             |
|---|-------------|-------------|-------------|
| C | 3.56058100  | -1.36240500 | 1.73307600  |
| H | 3.03053800  | -1.22035200 | 2.67497100  |
| C | 3.11108000  | -0.73651100 | 0.55156300  |
| C | 0.96680100  | 0.34099400  | 2.29588400  |
| C | 0.36204800  | -0.84655600 | 2.75719000  |
| H | 0.27404800  | -1.71559000 | 2.10290500  |
| C | -0.06865600 | -0.94368100 | 4.08152000  |
| H | -0.51171900 | -1.87327200 | 4.44404800  |
| C | 0.08691400  | 0.14488000  | 4.95594300  |
| H | -0.24669500 | 0.06330400  | 5.99223900  |
| C | 0.68902100  | 1.32375400  | 4.50429900  |
| H | 0.83516000  | 2.16225000  | 5.18787200  |
| C | 1.13088500  | 1.42935700  | 3.18229800  |
| H | 1.63590400  | 2.33982300  | 2.86006000  |
| C | 3.61372000  | 2.35471000  | -0.02170300 |
| H | 4.32871800  | 1.53731000  | -0.11224800 |
| C | 4.05936100  | 3.67227300  | -0.15874100 |
| H | 5.11267800  | 3.86439000  | -0.37219100 |
| C | 3.16916900  | 4.74735400  | 0.00491200  |
| H | 3.52900300  | 5.77258400  | -0.10213600 |
| C | 1.82593800  | 4.50354200  | 0.32105800  |
| H | 1.13870200  | 5.33847700  | 0.46901100  |
| C | 1.36603600  | 3.19187200  | 0.44701600  |
| H | 0.32183500  | 3.01281000  | 0.70820800  |
| C | 2.26487300  | 2.10410800  | 0.29660000  |

---

**Table S3.** Coordinates (Å) of the optimized structure for the  $S = 1/2$  doublet ground state of  $[\text{Ru}(\text{L})(\text{PPh}_3)(\text{NO})(\text{Cl})]^+$ , calculated with BP86/TZVP (L = 1-phenyl-1-(pyridin-2-yl)-2-(pyridin-2-ylmethylene)hydrazine).

| Atom | X           | Y           | Z           |
|------|-------------|-------------|-------------|
| Ru   | -0.06044600 | -0.25662500 | -1.22414200 |
| Cl   | -1.65912000 | -0.84871200 | -2.97561600 |
| P    | 1.62559800  | 0.36711500  | 0.48051900  |
| O    | 1.32200800  | 0.17299700  | -3.77342300 |
| N    | 1.19180700  | 0.06815600  | -2.60658000 |
| N    | -1.08895400 | 1.59474500  | -1.16287500 |
| N    | -1.63772900 | -0.65782100 | 0.03425000  |
| N    | 0.16654300  | -2.34623300 | -0.86083400 |
| N    | -2.54686300 | 0.35175700  | 0.21660800  |
| C    | -0.79694200 | 2.71746500  | -1.85972200 |
| H    | 0.13153700  | 2.69324600  | -2.42811100 |
| C    | -1.62627400 | 3.83161800  | -1.86782000 |
| H    | -1.35147200 | 4.70399900  | -2.45969300 |
| C    | -2.79770000 | 3.79832600  | -1.10261600 |
| H    | -3.46891200 | 4.65812600  | -1.07393200 |
| C    | -3.11352200 | 2.65291200  | -0.37892200 |
| H    | -4.02166600 | 2.58927400  | 0.21855900  |
| C    | -2.24844000 | 1.54959000  | -0.44684000 |
| C    | -3.89250400 | 0.04724500  | 0.65559300  |
| C    | -4.22364800 | 0.18833300  | 2.00790300  |
| H    | -3.47064600 | 0.53297700  | 2.71929800  |
| C    | -5.52690100 | -0.11066900 | 2.42088100  |
| H    | -5.80178500 | 0.00235900  | 3.47107800  |
| C    | -6.47449800 | -0.54977900 | 1.48896600  |
| H    | -7.49048500 | -0.77974400 | 1.81552600  |
| C    | -6.12678700 | -0.69591900 | 0.13976900  |
| H    | -6.86811400 | -1.03953800 | -0.58391600 |
| C    | -4.82938700 | -0.39883700 | -0.28729000 |
| H    | -4.53234200 | -0.50937200 | -1.33319500 |
| C    | -1.89040800 | -1.92083700 | 0.30216500  |
| H    | -2.82581800 | -2.24642600 | 0.75893400  |
| C    | -0.88242800 | -2.86162500 | -0.12417800 |
| C    | -0.95627900 | -4.23600600 | 0.15693100  |
| H    | -1.79514200 | -4.61477000 | 0.74288400  |
| C    | 0.02955400  | -5.09311900 | -0.32600100 |
| H    | -0.02235500 | -6.16379400 | -0.12274900 |
| C    | 1.08069700  | -4.55935100 | -1.07872500 |
| H    | 1.86860400  | -5.19232700 | -1.48680900 |
| C    | 1.11424600  | -3.18550600 | -1.31872600 |
| H    | 1.91716500  | -2.73271600 | -1.89922400 |
| C    | 3.81533000  | -0.84200000 | -0.85278900 |
| H    | 3.40776000  | -0.38145400 | -1.75443000 |
| C    | 4.99104300  | -1.59421800 | -0.93807300 |
| H    | 5.48559000  | -1.71438800 | -1.90429300 |
| C    | 5.53145100  | -2.18738600 | 0.20856200  |
| H    | 6.44821600  | -2.77638500 | 0.14096300  |
| C    | 4.89470000  | -2.01736200 | 1.44147900  |
| H    | 5.31291000  | -2.47187100 | 2.34196800  |

|   |             |             |             |
|---|-------------|-------------|-------------|
| C | 3.72368200  | -1.25708600 | 1.53471800  |
| H | 3.24592700  | -1.12566700 | 2.50609800  |
| C | 3.17140100  | -0.66225800 | 0.38725800  |
| C | 1.12413200  | 0.23283500  | 2.26288000  |
| C | 0.47623400  | -0.93938000 | 2.69434400  |
| H | 0.25786000  | -1.73748600 | 1.98424400  |
| C | 0.13205600  | -1.10603800 | 4.03889900  |
| H | -0.36124900 | -2.02531600 | 4.36161900  |
| C | 0.42245700  | -0.10108700 | 4.96851100  |
| H | 0.15208100  | -0.23014100 | 6.01842200  |
| C | 1.07291800  | 1.06344600  | 4.54895900  |
| H | 1.31656200  | 1.84606000  | 5.27037200  |
| C | 1.42789700  | 1.23051200  | 3.20563400  |
| H | 1.95093200  | 2.13650400  | 2.89836900  |
| C | 3.52082100  | 2.42925500  | -0.11160400 |
| H | 4.23987300  | 1.63391200  | -0.31005800 |
| C | 3.91606300  | 3.76444500  | -0.25412300 |
| H | 4.93433200  | 3.99178400  | -0.57592300 |
| C | 3.02005200  | 4.80033800  | 0.02489100  |
| H | 3.33425700  | 5.84058400  | -0.08005600 |
| C | 1.72083000  | 4.49794500  | 0.44902500  |
| H | 1.01792100  | 5.30093600  | 0.68013600  |
| C | 1.31664600  | 3.16660600  | 0.57917800  |
| H | 0.30392500  | 2.94501400  | 0.92174800  |
| C | 2.21609800  | 2.11780700  | 0.30513400  |

---



**Table S4.** Coordinates (Å) of the optimized structure for the  $S = 0$  singlet ground state of  $[\text{Ru}(\text{L})(\text{PPh}_3)(\text{NO})(\text{Cl})]^{2+}$ , calculated with BP86/TZVP in conjunction with the ZORA approximation (L = 1-phenyl-1-(pyridin-2-yl)-2-(pyridin-2-ylmethylene)hydrazine).

| Atom | X           | Y           | Z           |
|------|-------------|-------------|-------------|
| Ru   | 0.09350000  | -0.32860000 | -1.35300000 |
| Cl   | -1.39650000 | -1.05430000 | -3.12630000 |
| P    | 1.49010000  | 0.39250000  | 0.60820000  |
| O    | 2.09460000  | 0.18900000  | -3.42400000 |
| N    | 1.37830000  | -0.01170000 | -2.54450000 |
| N    | -0.97630000 | 1.48210000  | -1.44410000 |
| N    | -1.55290000 | -0.71440000 | -0.19440000 |
| N    | 0.34160000  | -2.38360000 | -0.89720000 |
| N    | -2.45190000 | 0.29790000  | -0.04430000 |
| C    | -0.67840000 | 2.55920000  | -2.21200000 |
| H    | 0.27260000  | 2.53040000  | -2.73870000 |
| C    | -1.53390000 | 3.64410000  | -2.32860000 |
| H    | -1.25510000 | 4.48020000  | -2.96800000 |
| C    | -2.73660000 | 3.63280000  | -1.61380000 |
| H    | -3.42850000 | 4.47300000  | -1.67770000 |
| C    | -3.05740000 | 2.53360000  | -0.82470000 |
| H    | -3.99020000 | 2.48410000  | -0.26610000 |
| C    | -2.16480000 | 1.45540000  | -0.77730000 |
| C    | -3.76100000 | 0.03210000  | 0.51910000  |
| C    | -3.97800000 | 0.26730000  | 1.88100000  |
| H    | -3.17150000 | 0.65200000  | 2.50700000  |
| C    | -5.24540000 | 0.00970000  | 2.41220000  |
| H    | -5.43710000 | 0.19610000  | 3.46930000  |
| C    | -6.26580000 | -0.47850000 | 1.58870000  |
| H    | -7.25340000 | -0.67400000 | 2.00840000  |
| C    | -6.03020000 | -0.71410000 | 0.22870000  |
| H    | -6.83040000 | -1.09030000 | -0.40960000 |
| C    | -4.77040000 | -0.46110000 | -0.31910000 |
| H    | -4.57000000 | -0.63520000 | -1.37810000 |
| C    | -1.73600000 | -1.94400000 | 0.21140000  |
| H    | -2.63920000 | -2.24220000 | 0.74450000  |
| C    | -0.71380000 | -2.89090000 | -0.17000000 |
| C    | -0.79240000 | -4.25500000 | 0.13240000  |
| H    | -1.63940000 | -4.62770000 | 0.70890000  |
| C    | 0.20160000  | -5.11920000 | -0.32830000 |
| H    | 0.14820000  | -6.18640000 | -0.11180000 |
| C    | 1.25460000  | -4.59600000 | -1.07760000 |
| H    | 2.04750000  | -5.23300000 | -1.46790000 |
| C    | 1.29220000  | -3.22480000 | -1.34090000 |
| H    | 2.10140000  | -2.78960000 | -1.92280000 |
| C    | 3.77270000  | -1.00690000 | -0.31300000 |
| H    | 3.48210000  | -0.68940000 | -1.31420000 |
| C    | 4.96430000  | -1.71870000 | -0.15780000 |
| H    | 5.56700000  | -1.96370000 | -1.03350000 |
| C    | 5.38650000  | -2.10660000 | 1.11810000  |
| H    | 6.31650000  | -2.66340000 | 1.24010000  |
| C    | 4.62080000  | -1.76690000 | 2.23620000  |
| H    | 4.95260000  | -2.05340000 | 3.23500000  |
| C    | 3.43160000  | -1.04670000 | 2.08830000  |
| H    | 2.85940000  | -0.77350000 | 2.97400000  |

|   |             |             |            |
|---|-------------|-------------|------------|
| C | 2.99340000  | -0.66550000 | 0.80770000 |
| C | 0.62700000  | 0.31220000  | 2.23920000 |
| C | 0.19890000  | -0.94320000 | 2.71510000 |
| H | 0.37740000  | -1.84600000 | 2.12960000 |
| C | -0.39470000 | -1.05350000 | 3.97380000 |
| H | -0.70040000 | -2.03290000 | 4.34470000 |
| C | -0.57660000 | 0.08520000  | 4.76720000 |
| H | -1.03040000 | -0.00410000 | 5.75510000 |
| C | -0.14850000 | 1.33130000  | 4.30250000 |
| H | -0.26310000 | 2.21820000  | 4.92720000 |
| C | 0.45260000  | 1.44970000  | 3.04490000 |
| H | 0.81360000  | 2.42340000  | 2.71630000 |
| C | 3.49920000  | 2.35980000  | 0.29070000 |
| H | 4.21290000  | 1.53760000  | 0.32630000 |
| C | 3.96970000  | 3.66930000  | 0.15620000 |
| H | 5.04280000  | 3.84760000  | 0.07680000 |
| C | 3.07620000  | 4.74280000  | 0.13640000 |
| H | 3.44910000  | 5.76310000  | 0.03930000 |
| C | 1.70210000  | 4.50660000  | 0.25210000 |
| H | 1.00140000  | 5.34270000  | 0.25190000 |
| C | 1.22130000  | 3.20140000  | 0.37470000 |
| H | 0.14820000  | 3.03880000  | 0.47740000 |
| C | 2.11890000  | 2.11570000  | 0.40250000 |

---

**Table S5.** Coordinates (Å) of the optimized structure for the  $S = 0$  singlet ground state of  $[\text{Ru}(\text{L})(\text{PPh}_3)(\text{NO})(\text{Cl})]^{2+}$ , calculated with BP86/def2-TZVPP(L = 1-phenyl-1-(pyridin-2-yl)-2-(pyridin-2-ylmethylene)hydrazine).

| Atom | X           | Y           | Z           |
|------|-------------|-------------|-------------|
| Ru   | 0.10350000  | -0.31690000 | -1.34420000 |
| Cl   | -1.37220000 | -1.03470000 | -3.11870000 |
| P    | 1.51190000  | 0.40140000  | 0.63010000  |
| O    | 2.12430000  | 0.25160000  | -3.37930000 |
| N    | 1.39910000  | 0.02360000  | -2.51740000 |
| N    | -0.97830000 | 1.49810000  | -1.42960000 |
| N    | -1.55400000 | -0.70700000 | -0.19230000 |
| N    | 0.34620000  | -2.38550000 | -0.89210000 |
| N    | -2.45760000 | 0.29720000  | -0.05060000 |
| C    | -0.68260000 | 2.58010000  | -2.18750000 |
| H    | 0.26980000  | 2.55940000  | -2.71060000 |
| C    | -1.54070000 | 3.66270000  | -2.30120000 |
| H    | -1.26280000 | 4.50320000  | -2.93370000 |
| C    | -2.74660000 | 3.64050000  | -1.59360000 |
| H    | -3.44180000 | 4.47710000  | -1.65480000 |
| C    | -3.06550000 | 2.53460000  | -0.81460000 |
| H    | -4.00050000 | 2.47740000  | -0.26220000 |
| C    | -2.16760000 | 1.46100000  | -0.76870000 |
| C    | -3.76560000 | 0.02750000  | 0.50990000  |
| C    | -3.98710000 | 0.25650000  | 1.87140000  |
| H    | -3.18420000 | 0.64130000  | 2.50040000  |
| C    | -5.25380000 | -0.00720000 | 2.39940000  |
| H    | -5.44740000 | 0.17450000  | 3.45600000  |
| C    | -6.27050000 | -0.49630000 | 1.57310000  |
| H    | -7.25710000 | -0.69710000 | 1.98990000  |
| C    | -6.03130000 | -0.72580000 | 0.21370000  |
| H    | -6.82760000 | -1.10280000 | -0.42730000 |
| C    | -4.77170000 | -0.46630000 | -0.33030000 |
| H    | -4.56930000 | -0.63640000 | -1.38850000 |
| C    | -1.73490000 | -1.93760000 | 0.20860000  |
| H    | -2.63930000 | -2.24080000 | 0.73530000  |
| C    | -0.71130000 | -2.88450000 | -0.16770000 |
| C    | -0.80030000 | -4.24820000 | 0.13180000  |
| H    | -1.65070000 | -4.61470000 | 0.70550000  |
| C    | 0.18730000  | -5.11880000 | -0.32790000 |
| H    | 0.12600000  | -6.18490000 | -0.11270000 |
| C    | 1.24330000  | -4.60270000 | -1.07650000 |
| H    | 2.03060000  | -5.24410000 | -1.46850000 |
| C    | 1.28910000  | -3.23160000 | -1.33680000 |
| H    | 2.09900000  | -2.80240000 | -1.92100000 |
| C    | 3.75560000  | -1.03400000 | -0.29650000 |
| H    | 3.44870000  | -0.74430000 | -1.30020000 |
| C    | 4.94220000  | -1.75240000 | -0.14180000 |
| H    | 5.52690000  | -2.02720000 | -1.01960000 |
| C    | 5.38260000  | -2.10890000 | 1.13620000  |
| H    | 6.30790000  | -2.67180000 | 1.25750000  |
| C    | 4.63860000  | -1.73250000 | 2.25650000  |
| H    | 4.98330000  | -1.99510000 | 3.25650000  |
| C    | 3.45480000  | -1.00580000 | 2.10800000  |
| H    | 2.90050000  | -0.70530000 | 2.99500000  |

|   |             |             |             |
|---|-------------|-------------|-------------|
| C | 2.99650000  | -0.65290000 | 0.82540000  |
| C | 0.64630000  | 0.31880000  | 2.23920000  |
| C | 0.22530000  | -0.94160000 | 2.70960000  |
| H | 0.41900000  | -1.83970000 | 2.12320000  |
| C | -0.38270000 | -1.06190000 | 3.95910000  |
| H | -0.68180000 | -2.04480000 | 4.32330000  |
| C | -0.58460000 | 0.07190000  | 4.75380000  |
| H | -1.04990000 | -0.02470000 | 5.73460000  |
| C | -0.16450000 | 1.32300000  | 4.29750000  |
| H | -0.29490000 | 2.20620000  | 4.92270000  |
| C | 0.45070000  | 1.45060000  | 3.04870000  |
| H | 0.80410000  | 2.42850000  | 2.72770000  |
| C | 3.50650000  | 2.35290000  | 0.26090000  |
| H | 4.22060000  | 1.53200000  | 0.28770000  |
| C | 3.97380000  | 3.65940000  | 0.09990000  |
| H | 5.04380000  | 3.83600000  | -0.00700000 |
| C | 3.08070000  | 4.73240000  | 0.09030000  |
| H | 3.45050000  | 5.75080000  | -0.02700000 |
| C | 1.71040000  | 4.49760000  | 0.24100000  |
| H | 1.01040000  | 5.33300000  | 0.24850000  |
| C | 1.23310000  | 3.19510000  | 0.38930000  |
| H | 0.16310000  | 3.03370000  | 0.51470000  |
| C | 2.12910000  | 2.10710000  | 0.40830000  |

---

**Table S6.** Coordinates (Å) of the optimized structure for the  $S = 0$  singlet ground state of  $[\text{Ru}(\text{L})(\text{PPh}_3)(\text{NO})(\text{Cl})]^{2+}$ , calculated with BP86/def2-TZVPP in conjunction with the ZORA approximation (L = 1-phenyl-1-(pyridin-2-yl)-2-(pyridin-2-ylmethylene)hydrazine).

| Atom | X           | Y           | Z           |
|------|-------------|-------------|-------------|
| Ru   | 0.09920000  | -0.31480000 | -1.33760000 |
| Cl   | -1.36750000 | -1.02880000 | -3.10650000 |
| P    | 1.49430000  | 0.39620000  | 0.61910000  |
| O    | 2.13860000  | 0.26380000  | -3.32900000 |
| N    | 1.39100000  | 0.02900000  | -2.48520000 |
| N    | -0.97280000 | 1.48510000  | -1.42870000 |
| N    | -1.54580000 | -0.70970000 | -0.18980000 |
| N    | 0.34940000  | -2.36610000 | -0.90710000 |
| N    | -2.44670000 | 0.29590000  | -0.03700000 |
| C    | -0.67910000 | 2.56260000  | -2.19480000 |
| H    | 0.26970000  | 2.53570000  | -2.72410000 |
| C    | -1.53450000 | 3.64680000  | -2.30870000 |
| H    | -1.25750000 | 4.48260000  | -2.94760000 |
| C    | -2.73600000 | 3.63300000  | -1.59390000 |
| H    | -3.42850000 | 4.47160000  | -1.65540000 |
| C    | -3.05390000 | 2.53200000  | -0.80740000 |
| H    | -3.98600000 | 2.47980000  | -0.24970000 |
| C    | -2.15960000 | 1.45650000  | -0.76160000 |
| C    | -3.75280000 | 0.02650000  | 0.52790000  |
| C    | -3.96890000 | 0.25530000  | 1.89000000  |
| H    | -3.16350000 | 0.63970000  | 2.51600000  |
| C    | -5.23360000 | -0.00790000 | 2.42260000  |
| H    | -5.42320000 | 0.17370000  | 3.48000000  |
| C    | -6.25350000 | -0.49620000 | 1.60020000  |
| H    | -7.23870000 | -0.69650000 | 2.02070000  |
| C    | -6.01970000 | -0.72530000 | 0.24000000  |
| H    | -6.81870000 | -1.10150000 | -0.39810000 |
| C    | -4.76230000 | -0.46620000 | -0.30870000 |
| H    | -4.56440000 | -0.63560000 | -1.36780000 |
| C    | -1.72340000 | -1.94070000 | 0.21110000  |
| H    | -2.62320000 | -2.24620000 | 0.74390000  |
| C    | -0.69820000 | -2.88020000 | -0.17700000 |
| C    | -0.77470000 | -4.24580000 | 0.11340000  |
| H    | -1.61760000 | -4.62210000 | 0.69180000  |
| C    | 0.21500000  | -5.10600000 | -0.36130000 |
| H    | 0.16360000  | -6.17400000 | -0.15330000 |
| C    | 1.25940000  | -4.57630000 | -1.11620000 |
| H    | 2.04740000  | -5.20880000 | -1.52080000 |
| C    | 1.29350000  | -3.20350000 | -1.36710000 |
| H    | 2.09400000  | -2.76510000 | -1.95710000 |
| C    | 3.74390000  | -1.04210000 | -0.29080000 |
| H    | 3.44710000  | -0.75140000 | -1.29700000 |
| C    | 4.92850000  | -1.76170000 | -0.12760000 |
| H    | 5.51870000  | -2.03710000 | -1.00160000 |
| C    | 5.36050000  | -2.11790000 | 1.15310000  |
| H    | 6.28450000  | -2.68140000 | 1.28070000  |
| C    | 4.61010000  | -1.73890000 | 2.26800000  |
| H    | 4.94810000  | -2.00030000 | 3.27050000  |
| C    | 3.42820000  | -1.01110000 | 2.11110000  |

|   |             |             |             |
|---|-------------|-------------|-------------|
| H | 2.86960000  | -0.70860000 | 2.99470000  |
| C | 2.97780000  | -0.65990000 | 0.82570000  |
| C | 0.62560000  | 0.32110000  | 2.22870000  |
| C | 0.20780000  | -0.93670000 | 2.70780000  |
| H | 0.40540000  | -1.83890000 | 2.12910000  |
| C | -0.40050000 | -1.04990000 | 3.95770000  |
| H | -0.69690000 | -2.03110000 | 4.32850000  |
| C | -0.60510000 | 0.08850000  | 4.74470000  |
| H | -1.06990000 | -0.00260000 | 5.72630000  |
| C | -0.18740000 | 1.33710000  | 4.28020000  |
| H | -0.31920000 | 2.22430000  | 4.89930000  |
| C | 0.42800000  | 1.45740000  | 3.03070000  |
| H | 0.77990000  | 2.43390000  | 2.70380000  |
| C | 3.49940000  | 2.34020000  | 0.26120000  |
| H | 4.21020000  | 1.51670000  | 0.29380000  |
| C | 3.97320000  | 3.64450000  | 0.10160000  |
| H | 5.04460000  | 3.81610000  | 0.00140000  |
| C | 3.08490000  | 4.72110000  | 0.08440000  |
| H | 3.45970000  | 5.73770000  | -0.03180000 |
| C | 1.71300000  | 4.49200000  | 0.22640000  |
| H | 1.01630000  | 5.33030000  | 0.22860000  |
| C | 1.22930000  | 3.19180000  | 0.37330000  |
| H | 0.15800000  | 3.03570000  | 0.49330000  |
| C | 2.12040000  | 2.10030000  | 0.39900000  |

---

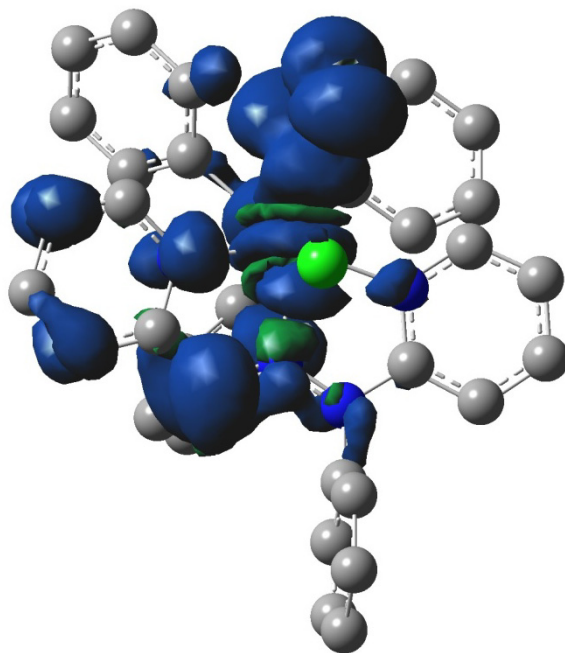

**Figure S1.** Spin density plot for the  $S = 1/2$  doublet ground state of  $[\text{Ru}(\text{L})(\text{PPh}_3)(\text{NO})(\text{Cl})]^+$  calculated with BP86/TZVP. Hydrogen atoms are omitted for clarity.

**Table S7.** Comparison of geometric parameters and N–O stretching frequencies of  $[\text{Ru}(\text{L})(\text{PPh}_3)(\text{NO})(\text{Cl})]^{2+}$  and  $[\text{Ru}(\text{L})(\text{PPh}_3)(\text{NO})(\text{Cl})]^{3+}$  (calculated structures obtained with BP86/TZVP).

| Complex                                                                          | Geometric Parameters (Å) |       |       |       |                       | $\nu(\text{N-O})$ ( $\text{cm}^{-1}$ ) |
|----------------------------------------------------------------------------------|--------------------------|-------|-------|-------|-----------------------|----------------------------------------|
|                                                                                  | Ru–N(N–O)                | N–O   | Ru–Cl | Ru–P  | $\angle\text{Ru–N–O}$ |                                        |
| $[\text{Ru}(\text{L})(\text{PPh}_3)(\text{NO})(\text{Cl})]^{2+}$ , cryst. struc. | 1.731                    | 1.142 | 2.386 | 2.401 | 174                   | 1890                                   |
| $[\text{Ru}(\text{L})(\text{PPh}_3)(\text{NO})(\text{Cl})]^{3+}$ , exp.          | -                        | -     | -     | -     | -                     | 1910                                   |
| <i>DFT-optimized</i>                                                             |                          |       |       |       |                       |                                        |
| $[\text{Ru}(\text{L})(\text{PPh}_3)(\text{NO})(\text{Cl})]^{2+}$ , $S = 0$       | 1.800                    | 1.151 | 2.430 | 2.541 | 180                   | 1889                                   |
| $[\text{Ru}(\text{L})(\text{PPh}_3)(\text{NO})(\text{Cl})]^{3+}$ , $S = 1/2$     | 1.812                    | 1.144 | 2.421 | 2.621 | 169                   | 1911                                   |
| $[\text{Ru}(\text{L})(\text{PPh}_3)(\text{NO})(\text{Cl})]^{+}$ , $S = 1/2$      | 1.890                    | 1.180 | 2.440 | 2.480 | 144                   | 1705                                   |



**Table S8.** Comparison of geometric parameters and N–O stretching frequencies of  $[\text{Ru}(\text{L})(\text{PPh}_3)(\text{NO})(\text{Cl})]^{2+}$  obtained with BP86/TZVP, TPSSh/TZVP, and BP86/6-31G\*.

| Complex                                                                                               | Geometric Parameters (Å) |       |       |       |                       | $\nu(\text{N-O})$ ( $\text{cm}^{-1}$ ) |
|-------------------------------------------------------------------------------------------------------|--------------------------|-------|-------|-------|-----------------------|----------------------------------------|
|                                                                                                       | Ru-N                     | N-O   | Ru-Cl | Ru-P  | $\angle\text{Ru-N-O}$ |                                        |
| $[\text{Ru}(\text{L})(\text{PPh}_3)(\text{NO})(\text{Cl})]^{2+}$ , cryst.<br>struc.                   | 1.731                    | 1.142 | 2.386 | 2.406 | 174                   | 1890                                   |
| <i>BP86/TZVP opt.</i><br>$[\text{Ru}(\text{L})(\text{PPh}_3)(\text{NO})(\text{Cl})]^{2+}$ , $S = 0$   | 1.800                    | 1.151 | 2.430 | 2.541 | 180                   | 1889                                   |
| <i>TPSSh/TZVP opt.</i><br>$[\text{Ru}(\text{L})(\text{PPh}_3)(\text{NO})(\text{Cl})]^{2+}$ , $S = 0$  | 1.796                    | 1.136 | 2.422 | 2.519 | 171                   | 1970                                   |
| <i>BP86/6-31G* opt.</i><br>$[\text{Ru}(\text{L})(\text{PPh}_3)(\text{NO})(\text{Cl})]^{2+}$ , $S = 0$ | 1.794                    | 1.163 | 2.434 | 2.521 | 173                   | 1904                                   |

**Table S9.** Comparison of geometric parameters and N–O stretching frequencies of  $[\text{Ru}(\text{L})(\text{PPh}_3)(\text{NO})(\text{Cl})]^{2+}$  obtained with BP86/TZVP, BP86/TZVP with the ZORA approximation, BP86/def2-TZVPP, and BP86/def2-TZVPP with the ZORA approximation.

| Complex                                                                          | Geometric Parameters (Å) |       |       |       |                       | $\nu(\text{N-O})$ ( $\text{cm}^{-1}$ ) |
|----------------------------------------------------------------------------------|--------------------------|-------|-------|-------|-----------------------|----------------------------------------|
|                                                                                  | Ru-N                     | N-O   | Ru-Cl | Ru-P  | $\angle\text{Ru-N-O}$ |                                        |
| $[\text{Ru}(\text{L})(\text{PPh}_3)(\text{NO})(\text{Cl})]^{2+}$ , cryst. struc. | 1.731                    | 1.142 | 2.386 | 2.406 | 174                   | 1890                                   |
| <i>BP86/TZVP opt.</i>                                                            |                          |       |       |       |                       |                                        |
| $[\text{Ru}(\text{L})(\text{PPh}_3)(\text{NO})(\text{Cl})]^{2+}$ , $S = 0$       | 1.800                    | 1.151 | 2.430 | 2.541 | 180                   | 1889                                   |
| <i>BP86/TZVP with ZORA opt.</i>                                                  |                          |       |       |       |                       |                                        |
| $[\text{Ru}(\text{L})(\text{PPh}_3)(\text{NO})(\text{Cl})]^{2+}$ , $S = 0$       | 1.781                    | 1.152 | 2.427 | 2.513 | 172                   | 1892                                   |
| <i>BP86/def2-TZVPP opt.</i>                                                      |                          |       |       |       |                       |                                        |
| $[\text{Ru}(\text{L})(\text{NO})(\text{Cl})]^{2+}$ , $S = 0$                     | 1.781                    | 1.149 | 2.417 | 2.529 | 172                   | 1889                                   |
| <i>BP86/def2-TZVPP with ZORA opt.</i>                                            |                          |       |       |       |                       |                                        |
| $[\text{Ru}(\text{L})(\text{NO})(\text{Cl})]^{2+}$ , $S = 0$                     | 1.762                    | 1.152 | 2.407 | 2.507 | 173                   | 1886                                   |

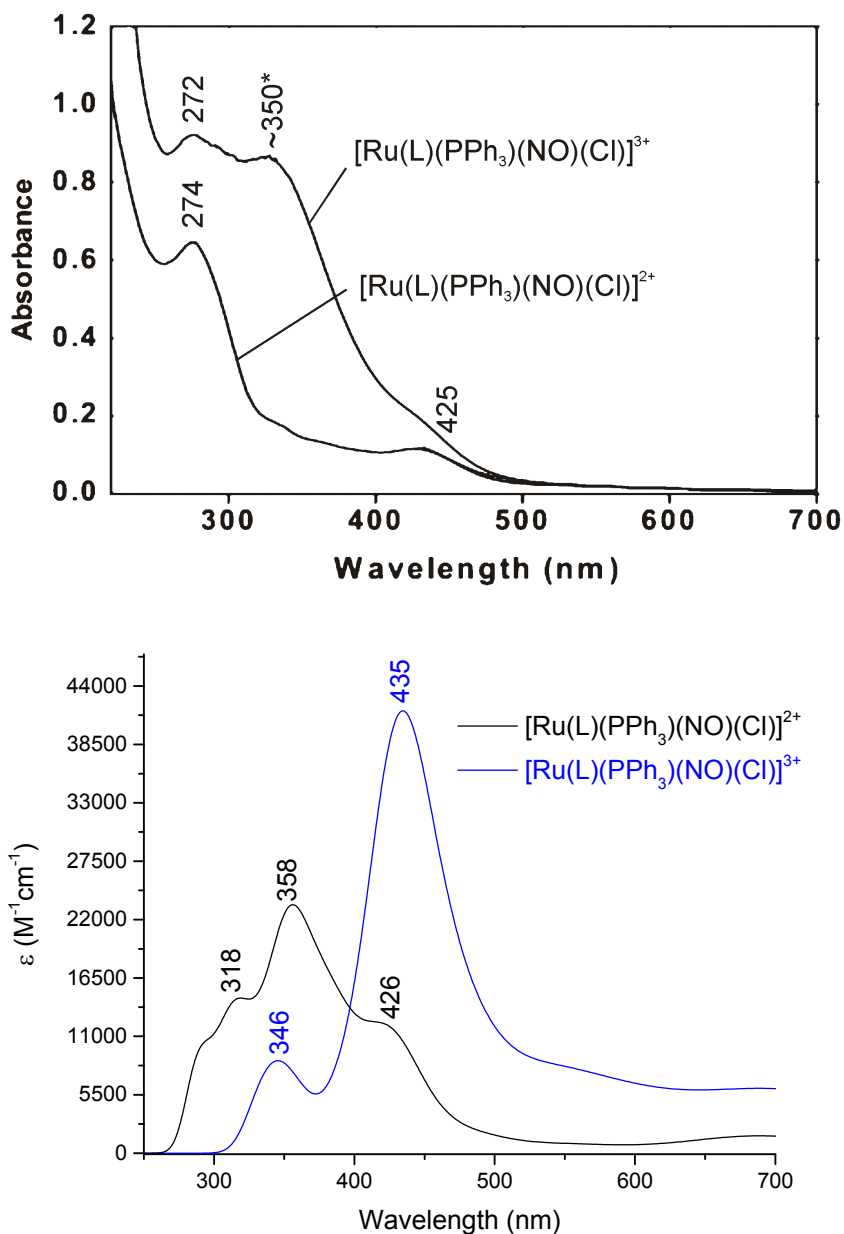

**Figure S2.** Comparison of the experimental UV-vis spectra of  $[\text{Ru}(\text{L})(\text{PPh}_3)(\text{NO})(\text{Cl})]^{2+/3+}$  (top) and the calculated UV-vis spectra of  $[\text{Ru}(\text{L})(\text{PPh}_3)(\text{NO})(\text{Cl})]^{2+}$  (black) and  $[\text{Ru}(\text{L})(\text{PPh}_3)(\text{NO})(\text{Cl})]^{3+}$  (blue; BP86/TZVP optimized structures; bottom). The \* in the experimental UV-vis spectrum indicates that the wavelength of this band is not given in reference 7. For the calculated spectra band widths at half-height were set to  $2500\text{ cm}^{-1}$ . The experimental UV-vis spectra are adapted from reference 7 with permission from The Royal Society of Chemistry. The calculations indicate that the new absorption feature at  $\sim 350\text{ nm}$  (calculated at  $435\text{ nm}$ ) that appears in the spectrum upon oxidation of the complex is mainly due to  $\pi \rightarrow \pi^*$  transitions of the generated co-ligand radical.

## References

- [1] (a) Perdew, J. P. *Phys. Rev. B*. **1986**, *33*, 8822. (b) Becke, A. D. *Phy. Rev. A*. **1988**, *38*, 3098.
- [2] (a) Schaefer, A.; Horn, H.; Ahlrichs, R. *J. Chem. Phys.* **1992**, *97*, 251. (b) Schaefer, A.; Huber, C.; Ahlrichs, R. *J. Chem. Phys.* **1994**, *100*, 5829.
- [3] Frisch, M. J.; Trucks, G. W.; Schlegel, H. B.; Scuseria, G. E.; Robb, M. A.; Cheeseman, J. R.; Scalmani, G.; Barone, V.; Mennucci, B.; Petersson, G. A.; Nakatsuji, H.; Caricato, M.; Li, X.; Hratchian, H. P.; Izmaylov, A. F.; Bloino, J.; Zheng, G.; Sonnenberg, J. L.; Hada, M.; Ehara, M.; Toyota, K.; Fukuda, R.; Hasegawa, J.; Ishida, M.; Nakajima, T.; Honda, Y.; Kitao, O.; Nakai, H.; Vreven, T.; Montgomery, J. A., Jr.; Peralta, J. E.; Ogliaro, F.; Bearpark, M.; Heyd, J. J.; Brothers, E.; Kudin, K. N.; Staroverov, V. N.; Kobayashi, R.; Normand, J.; Raghavachari, K.; Rendell, A.; Burant, J. C.; Iyengar, S. S.; Tomasi, J.; Cossi, M.; Rega, N.; Millam, N. J.; Klene, M.; Knox, J. E.; Cross, J. B.; Bakken, V.; Adamo, C.; Jaramillo, J.; Gomperts, R.; Stratmann, R. E.; Yazyev, O.; Austin, A. J.; Cammi, R.; Pomelli, C.; Ochterski, J. W.; Martin, R. L.; Morokuma, K.; Zakrzewski, V. G.; Voth, G. A.; Salvador, P.; Dannenberg, J. J.; Dapprich, S.; Daniels, A. D.; Farkas, Ö.; Foresman, J. B.; Ortiz, J. V.; Cioslowski, J.; Fox, D. J. Gaussian, Inc., Wallingford CT, 2009.
- [4] Weigend, F.; Ahlrichs, R. *Phys. Chem. Chem. Phys.* **2005**, *7*, 3297.
- [5] Pantazis, D. A.; Chen, X. Y.; Landis, C. R.; Neese, F. *J. Chem. Theory Comput.* **2008**, *4*, 908.
- [6] Neese, F.; ORCA (version 2.8); Max-Planck Institut fuer Bioanorganische Chemie: Muelheim/Ruhr, Germany, 2012.
- [7] Ghosh, K.; Kumar, R.; Kumar, S.; Meena, J. S. *Dalton Trans.* **2013**, *42*, 13444.
